# Supplementary material
Source: publisher site journal article supplement (https://www.dovepress.com/get_supplementary_file.php?f=318334.docx)
Supplement: Supplementary file 1 [file get_supplementary_file.php]

Supplementary Table 1. The association between AG and all-cause mortality in non-DIC patients of MIMIC-III.

| Exposure | Non-adjusted model  HR, 95%CI, P | Minimally-adjusted model  HR, 95%CI, P | Fully-adjusted model  HR, 95%CI, P |
| --- | --- | --- | --- |
| **In-hospital mortality** |  |  |  |
| Anion gap | 1.11 (1.10, 1.12) <0.0001 | 1.11 (1.10, 1.12) <0.0001 | 1.10 (1.09, 1.11) <0.0001 |
| Anion gap (quartiles) |  |  |  |
| Q1 | 1.0(Ref) | 1.0(Ref) | 1.0 (Ref) |
| Q2 | 1.48 (1.30, 1.69) <0.0001 | 1.47 (1.29, 1.68) <0.0001 | 1.55 (1.35, 1.78) <0.0001 |
| Q3 | 1.86 (1.64, 2.11) <0.0001 | 1.84 (1.62, 2.09) <0.0001 | 1.89 (1.65, 2.17) <0.0001 |
| Q4 | 3.03 (2.70, 3.39) <0.0001 | 3.18 (2.84, 3.57) <0.0001 | 2.97 (2.60, 3.39) <0.0001 |
| P for trend | 1.44 (1.40, 1.49) <0.0001 | 1.48 (1.43, 1.52) <0.0001 | 1.42 (1.36, 1.47) <0.0001 |
| **30-day mortality** |  |  |  |
| Anion gap | 1.11 (1.11, 1.12) <0.0001 | 1.12 (1.11, 1.12) <0.0001 | 1.10 (1.10, 1.11) <0.0001 |
| Anion gap (quartiles) |  |  |  |
| Q1 | 1.0(Ref) | 1.0(Ref) | 1.0 (Ref) |
| Q2 | 1.48 (1.32, 1.65) <0.0001 | 1.46 (1.30, 1.63) <0.0001 | 1.56 (1.39, 1.76) <0.0001 |
| Q3 | 1.86 (1.67, 2.07) <0.0001 | 1.83 (1.64, 2.04) <0.0001 | 1.91 (1.70, 2.15) <0.0001 |
| Q4 | 3.31 (3.00, 3.65) <0.0001 | 3.39 (3.08, 3.74) <0.0001 | 3.09 (2.76, 3.47) <0.0001 |
| P for trend | 1.49 (1.45, 1.54) <0.0001 | 1.51 (1.47, 1.56) <0.0001 | 1.44 (1.39, 1.49) <0.0001 |
| **90-day mortality** |  |  |  |
| Anion gap | 1.10 (1.09, 1.10) <0.0001 | 1.10 (1.10, 1.11) <0.0001 | 1.09 (1.08, 1.10) <0.0001 |
| Anion gap (quartiles) |  |  |  |
| Q1 | 1.0(Ref) | 1.0(Ref) | 1.0 (Ref) |
| Q2 | 1.41 (1.29, 1.54) <0.0001 | 1.39 (1.27, 1.52) <0.0001 | 1.47 (1.33, 1.62) <0.0001 |
| Q3 | 1.65 (1.51, 1.81) <0.0001 | 1.63 (1.49, 1.78) <0.0001 | 1.72 (1.56, 1.89) <0.0001 |
| Q4 | 2.71 (2.50, 2.93) <0.0001 | 2.79 (2.58, 3.02) <0.0001 | 2.58 (2.35, 2.84) <0.0001 |
| P for trend | 1.39 (1.36, 1.42) <0.0001 | 1.41 (1.37, 1.44) <0.0001 | 1.35 (1.31, 1.39) <0.0001 |

Non-adjusted model: no covariates was adjusted for.

Minimally-adjusted model: we only adjusted for age and sex.

Fully-adjusted model: we adjusted for age, sex, ethnicity, causes of DIC, SOFA score, SAPSII score, renal failure, CRRT, vasopressor drugs, **mechanical ventilation,** APTT, PT -INR, bicarbonate, creatinine, potassium, urea nitrogen, RDW.

CI: confidence interval. Ref: reference.
